# Supplementary material for: Genomes of the “Candidatus Actinomarinales” Order: Highly Streamlined Marine Epipelagic Actinobacteria
Source: PubMed Central journal article supplement (PMC7771536; doi:10.1128/msystems.01041-20), 2020-12-15

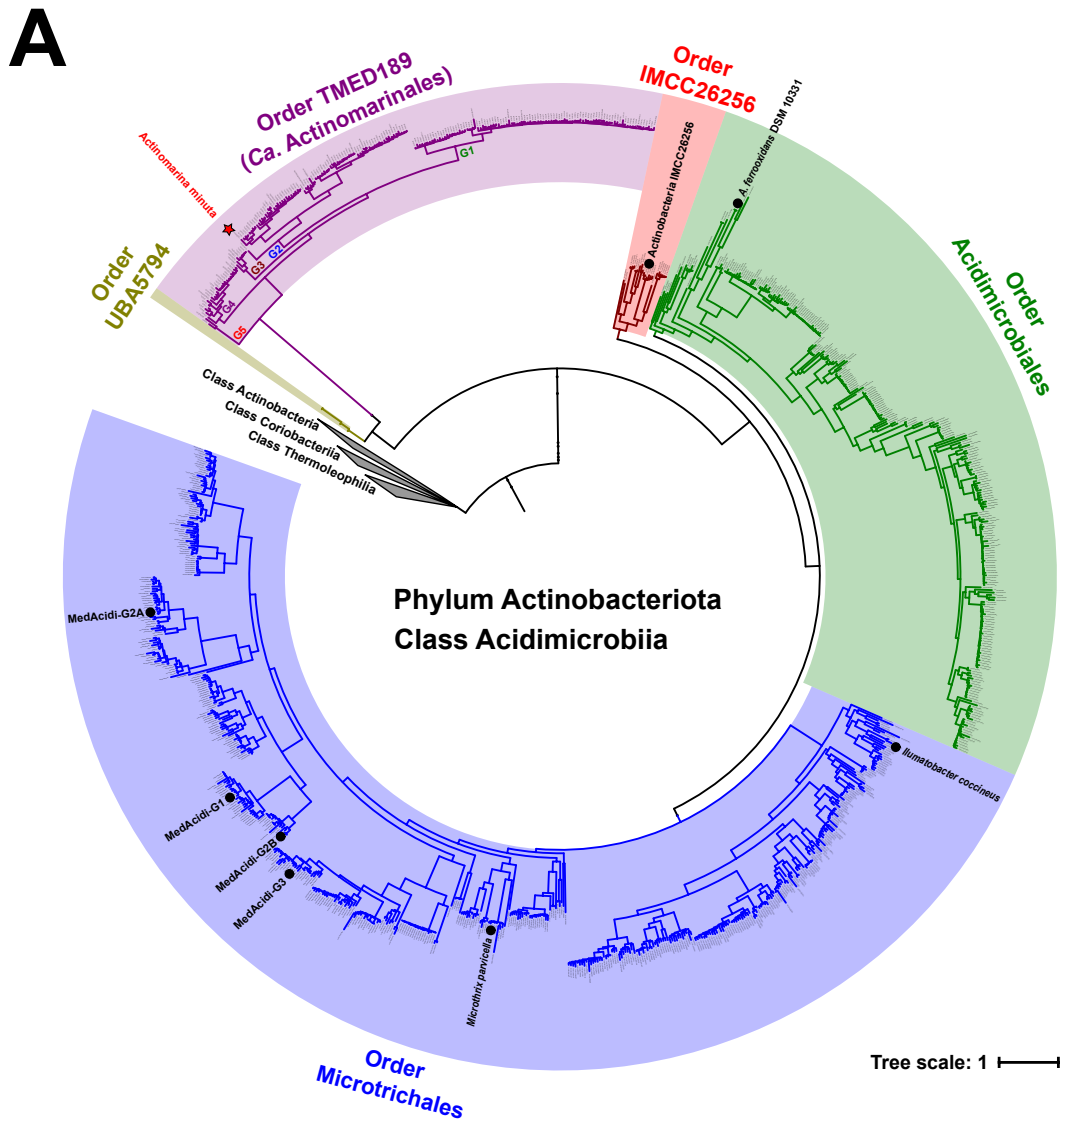

**GTDB taxonomy**

- Phylum **Actinobacteriota**
- Class **Acidimicrobiia**
- Order **TMED189**
- Family --
- Genus --
- Species--

**NCBI taxonomy**

- Phylum **Actinobacteria**
- Class **Actinobacteria**
- Order **Candidatus Actinomarinales**
- Family **Candidatus Actinomarinaceae**
- Genus **Candidatus Actinomarina**
- Species **Candidatus Actinomarina marina**

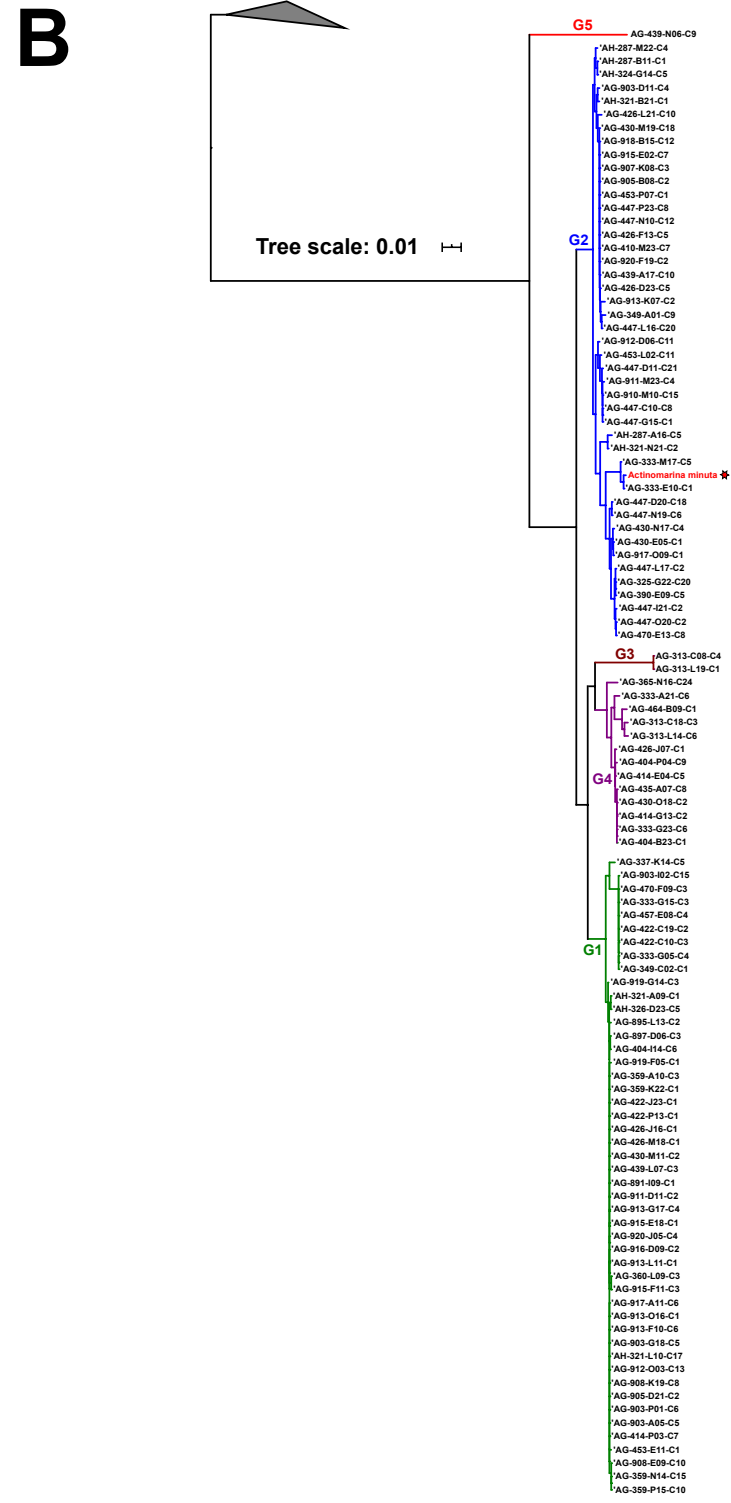

Supplement: mSystems.01041-20-sf001.pdf [file mSystems.01041-20-sf001.pdf]
