# Supplementary material for: Genomes of the “Candidatus Actinomarinales” Order: Highly Streamlined Marine Epipelagic Actinobacteria
Source: PubMed Central journal article supplement (PMC7771536; doi:10.1128/msystems.01041-20), 2020-12-15

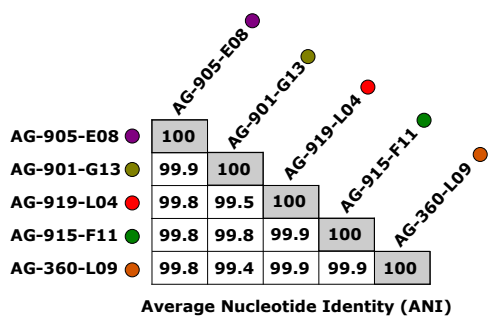

Cell wall biosynthesis and modifications

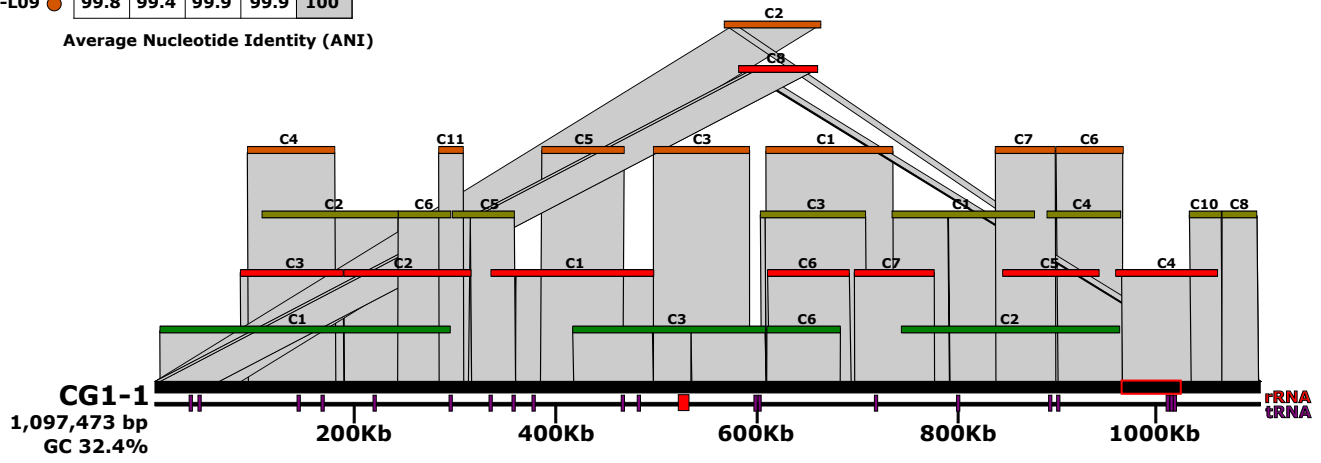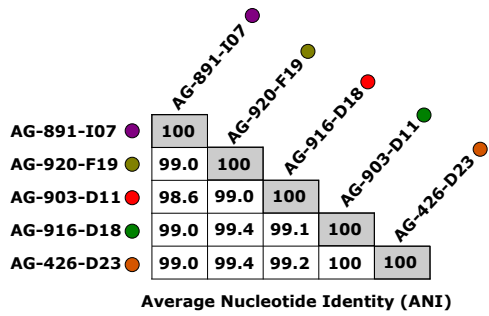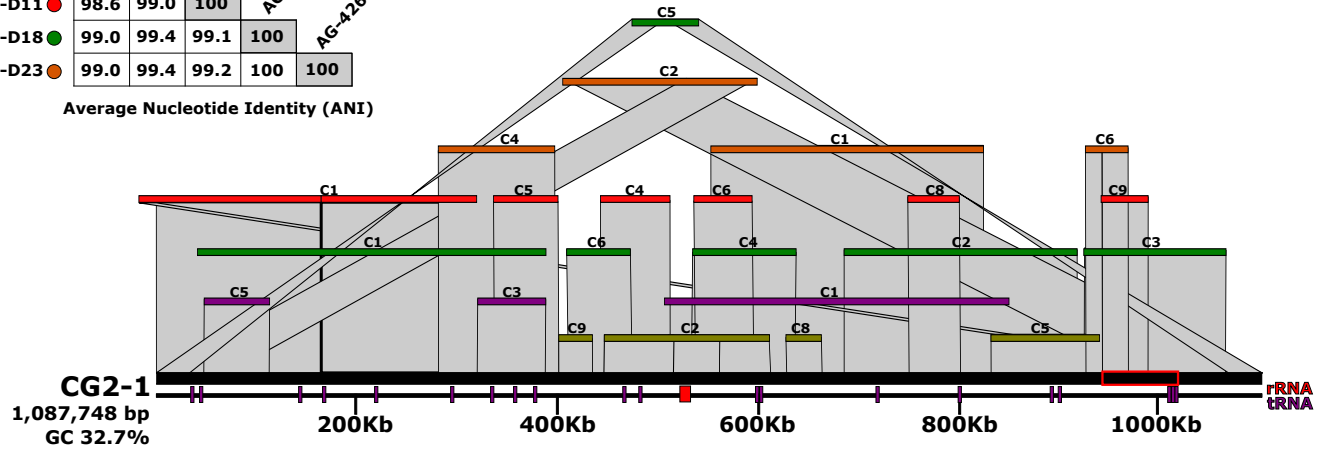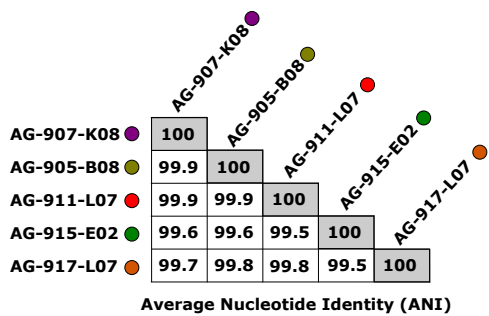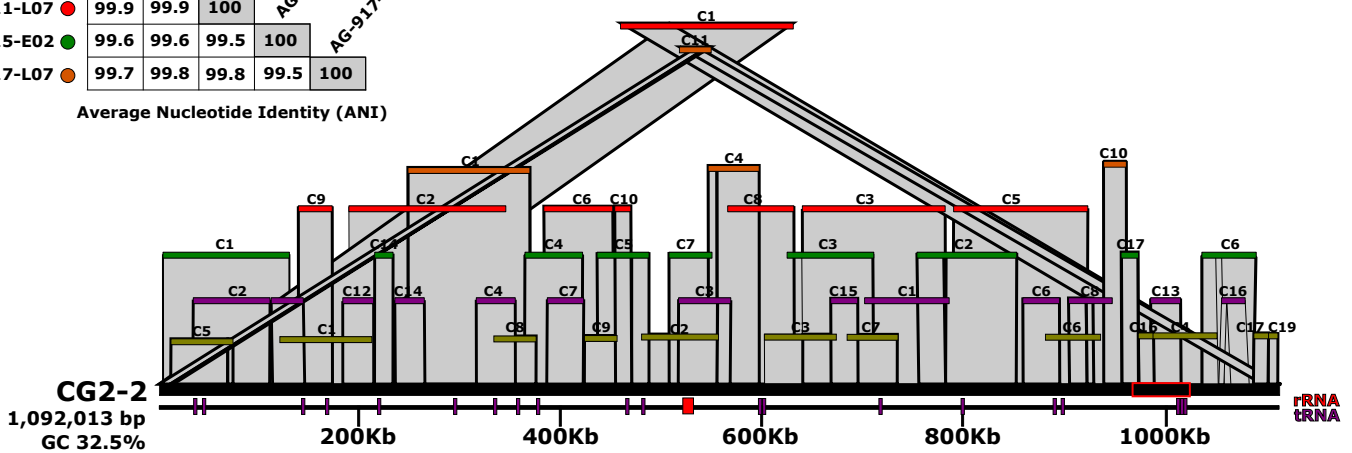

Supplement: mSystems.01041-20-sf003.pdf [file mSystems.01041-20-sf003.pdf]
