# Supplementary material for: Genomes of the “Candidatus Actinomarinales” Order: Highly Streamlined Marine Epipelagic Actinobacteria
Source: PubMed Central journal article supplement (PMC7771536; doi:10.1128/msystems.01041-20), 2020-12-15

**A**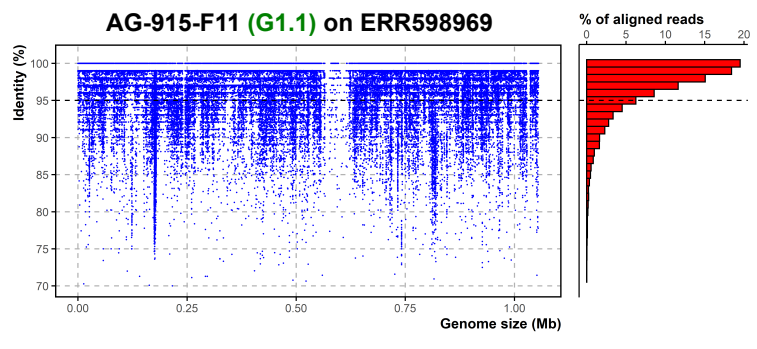**B**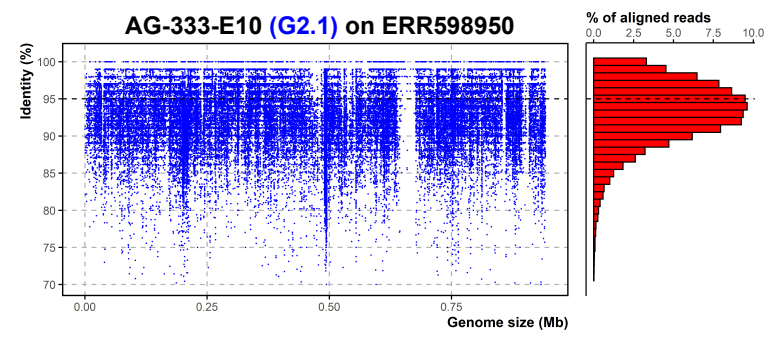

Supplement: mSystems.01041-20-sf005.pdf [file mSystems.01041-20-sf005.pdf]
